# Supplementary material
Source: MDPI journal article supplement (https://www.mdpi.com/2673-9879/4/1/15)
Supplement: s1 [file s1]

**Table S2.** Physicochemical properties comparison between different kinds of 5-Nitroimidazole derivatives.

| 5-nitroimidazole scaffolds                                    | Compound           | Molecular Weight | Properties                             |             |
|---------------------------------------------------------------|--------------------|------------------|----------------------------------------|-------------|
|                                                               |                    |                  | cLogP<br>(Conc_Octanol/<br>Conc_Water) | # sp3 atoms |
| Quinoline-based 5-nitroimidazole                              | 1, 2               | 360.3 ±40.3      | 1.37 ± 0.21                            | 6.0 ± 2.8   |
| 5-Nitroimidazole-3-carbaldehyde                               | 3a - 5             | 306.1 ± 31.94    | 0.92 ± 0.79                            | 3.8 ± 1.2   |
| Nitroimidazopyridazines                                       | 6 - 24             | 397.5 ± 115.3    | 1.17 ± 1.25                            | 7.7 ± 2.6   |
| 2-Pyrazoline spacer                                           | 25 - 28            | 452.1 ± 9.4      | 1.90 ± 0.44                            | 5.5 ± 0.5   |
| Metronidazole hybridized                                      | 29 - 50            | 429.5 ± 54.0     | 0.89 ± 0.78                            | 8.5 ± 1.2   |
| Fexinidazole based                                            | 51 - 53            | 295.3 ± 16.0     | 0.28 ± 0.74                            | 6 ± 0.0     |
| 2-(1-methyl-5-nitro-1H-imidazol-2-yl)-1,3,4-thiadiazole based | 54a - 54g          | 329.1 ± 42.0     | 0.34 ± 0.78                            | 6.8 ± 0.5   |
| Metronidazole based                                           | 55a - 62; 72a - 73 | 363.9 ± 79.7     | 0.53 ± 1.10                            | 10.2 ± 2.4  |
| Quinoline–metronidazole based                                 | 63a - 63m          | 480.5 ± 48.1     | 4.82 ± 0.90                            | 5.2 ± 0.4   |
| Nitroimidazolyl-benzofuranone hybrids                         | 64a - 65           | 306.1 ± 31.8     | 0.99 ± 0.77                            | 3.9 ± 1.1   |
| 3-Nitroimidazopyridines                                       | 66a - 70k          | 450.8 ± 75.8     | 2.47 ± 1.05                            | 4.4 ± 1.6   |
| Megazol based                                                 | 71a - 71d          | 250.2 ± 43.54    | 0.64 ± 0.58                            | 2.5 ± 0.5   |
