# Supplementary material
Source: MDPI journal article supplement (https://www.mdpi.com/2673-9879/4/1/15)
Supplement: s1 [file s1]

**Table S1.** Search Strategies and Keywords According to PRISMA Guidelines.

| Topics to be covered                                                            | Search engine  | Inclusion criteria                                                                                                                                                                  | Intra-search engine exclusion criteria |           |             |                           |                   | Inter-search engine exclusion criteria | Total of articles            |
|---------------------------------------------------------------------------------|----------------|-------------------------------------------------------------------------------------------------------------------------------------------------------------------------------------|----------------------------------------|-----------|-------------|---------------------------|-------------------|----------------------------------------|------------------------------|
|                                                                                 |                | Booleans                                                                                                                                                                            | Initial articles                       | < 5 years | Open access | First 10 pages of results | Title and content | No duplicate articles                  | Articles cited in this paper |
| <b>5'-nitroimidazole derivatives with anti- <i>Plasmodium</i> activity</b>      | PubMed         |                                                                                                                                                                                     | 366                                    | 127       | 94          | 94                        | 3                 |                                        |                              |
|                                                                                 | Google Scholar | (((((Malaria) OR (Plasmodium)) AND (nitroimidazole)) OR (5-nitroimidazole derivatives)) AND (treatments)) OR (host-targeted therapies)                                              | 1650                                   | 687       | 518         | 100                       | 13                |                                        |                              |
|                                                                                 | SciELO         |                                                                                                                                                                                     | 2                                      | 3         | 3           | 3                         | 1                 |                                        |                              |
|                                                                                 | Redalyc        |                                                                                                                                                                                     | 1                                      | 0         | 0           | 0                         | 0                 |                                        |                              |
|                                                                                 | EBSCO          |                                                                                                                                                                                     | 381105                                 | 443       | 425         | 100                       | 15                |                                        |                              |
| <b>5'-nitroimidazole derivatives with anti- <i>Leishmania</i> activity</b>      | PubMed         |                                                                                                                                                                                     | 410                                    | 138       | 92          | 92                        | 7                 |                                        |                              |
|                                                                                 | Google Scholar | (((((Leishmaniasis) OR (Leishmania)) AND (nitroimidazole)) OR (5-nitroimidazole derivatives)) AND (treatments)) OR (host-targeted therapies)                                        | 1430                                   | 625       | 462         | 100                       | 26                |                                        |                              |
|                                                                                 | SciELO         |                                                                                                                                                                                     | 2                                      | 1         | 1           | 1                         | 0                 |                                        |                              |
|                                                                                 | Redalyc        |                                                                                                                                                                                     | 1                                      | 1         | 1           | 1                         | 0                 | 128                                    | 53                           |
|                                                                                 | EBSCO          |                                                                                                                                                                                     | 690                                    | 386       | 382         | 100                       | 22                |                                        |                              |
| <b>5-Nitroimidazole Derivatives with anti-<i>Trypanosoma cruzi</i> activity</b> | PubMed         |                                                                                                                                                                                     | 1231                                   | 345       | 218         | 100                       | 22                |                                        |                              |
|                                                                                 | Google Scholar | (((((Chagas Disease) OR (American Trypanosomiasis)) OR (Trypanosoma cruzi)) AND (nitroimidazole)) OR (5-nitroimidazole derivatives)) AND (treatments)) OR (host-targeted therapies) | 1100                                   | 445       | 322         | 100                       | 28                |                                        |                              |
|                                                                                 | SciELO         |                                                                                                                                                                                     | 2                                      | 0         | 0           | 0                         | 0                 |                                        |                              |
|                                                                                 | Redalyc        |                                                                                                                                                                                     | 2                                      | 0         | 0           | 0                         | 0                 |                                        |                              |
|                                                                                 | EBSCO          |                                                                                                                                                                                     | 768                                    | 373       | 371         | 100                       | 20                |                                        |                              |
